# Supplementary material for: Combined lentiviral- and RNA-mediated CRISPR/Cas9 delivery for efficient and traceable gene editing in human hematopoietic stem and progenitor cells
Source: PubMed Central journal article supplement (PMC7769964; doi:10.1038/s41598-020-79724-x), 2020-12-28
Supplement: 41598_2020_79724_MOESM1_ESM.pdf [file 41598_2020_79724_MOESM1_ESM.pdf]

## Supplementary Information

### **Combined Lentiviral- and RNA-mediated CRISPR/Cas9 Delivery for Efficient and Traceable Gene Editing in Human Hematopoietic Stem and Progenitor Cells**

David Yudovich<sup>1,2</sup>, Alexandra Bäckström<sup>1,2</sup>, Ludwig Schmiderer<sup>1</sup>, Kristijonas Žemaitis<sup>1</sup>, Agatheeswaran Subramaniam<sup>1</sup> and Jonas Larsson<sup>1\*</sup>

<sup>1</sup>Division of Molecular Medicine and Gene Therapy, Lund Stem Cell Center, Lund University, Lund, Sweden

<sup>2</sup>Equal contribution

\*Correspondence to Jonas Larsson MD PhD, Molecular Medicine and Gene Therapy, BMC A12, 221 84, Lund, Sweden; phone: +46-46-2220580; fax: +46-46-2220568; e-mail: [jonas.larsson@med.lu.se](mailto:jonas.larsson@med.lu.se)

**Supplementary Table 1. List of unique predicted off-target sites for CD45 sg5**

| Number | Chr position             | Score | NGS        |
|--------|--------------------------|-------|------------|
| 1      | Chr2:28427250-28427271   | 0.97  | Yes        |
| 2      | Chr8:144448492-144448513 | 0.99  | Yes        |
| 3      | ChrX:153573824-153573845 | 2.43  | Yes        |
| 4      | Chr6:42935481-42935501   | 3.02  | Yes        |
| 5      | Chr15:90000801-90000821  | 3.02  | PCR failed |
| 6      | Chr16:49494734-49494754  | 4.68  | N/A        |
| 7      | Chr7:98949526-98949547   | 4.7   | N/A        |
| 8      | Chr16:48447603-48447623  | 5.64  | N/A        |
| 9      | Chr18:76612153-76612173  | 5.86  | N/A        |
| 10     | Chr19:8903492-8903513    | 6.13  | N/A        |

**Supplementary Table 2. Off-target editing (% modification normalized to on-target efficiency for each condition) for CD45 sg5**

| Sample                        | Off-target site              |                                |                                |                              |
|-------------------------------|------------------------------|--------------------------------|--------------------------------|------------------------------|
|                               | #1<br>Chr2:28427250-28427271 | #2<br>Chr8:144448492-144448513 | #3<br>ChrX:153573824-153573845 | #4<br>Chr6:42935481-42935501 |
| Untreated                     | 0.03                         | 0.00                           | 0.00                           | 0.00                         |
| RNP<br>(3 µg)                 | 0.00                         | 10.15                          | 1.91                           | 1.16                         |
| mRNA<br>(1.5 µg)              | 0.58                         | 4.47                           | 0.63                           | 0.29                         |
| LV sg5 +<br>protein<br>(3 µg) | 0.00                         | 0.00                           | 0.00                           | 0.00                         |
| LV sg5 +<br>mRNA<br>(1.5 µg)  | 0.13                         | 2.00                           | 0.00                           | 0.00                         |

**Supplementary Table 3. sgRNA sequences**

| Gene target   | Guide | Sequence              |
|---------------|-------|-----------------------|
| CD45          | sg5*  | GGTGCTGGTGTGGGCGCAC   |
| CD45          | sg8   | GGGCGCACAGGAACCTATAT  |
| Non-targeting | ntA   | GACGGAGGCTAAGCGTCGCAA |
| CD44          | sg1   | GAAGGGCACGTGGTGATTCCC |
| CD44          | sg2   | GCAATATGTGTCATACTGGG  |
| CD44          | sg3   | GTACAGGTATGGGTTCATAGA |
| CD44          | sg4   | GCCAGCTATTGTTAACCGTGA |
| CD29          | sg1   | GTCATCACATCGTGCAGAAGT |
| CD29          | sg2   | GAATGTAACCAACCGTAGCAA |
| CD29          | sg3   | GCATAAGGTAGTAGAGGTCAA |
| CD29          | sg4   | GACAGCGCATATCTGGAAATT |

\*sgRNA sequence adapted from Gundry *et al.* 2016.

**Supplementary Table 4. Primer sequences**

| Primer            | Sequence 5'-3'         |
|-------------------|------------------------|
| CD45_G5_Tag_FWD   | CTGGGGCTGACTTTCCTCAG   |
| CD45_G5_Tag_REV   | TGAGCATCTCTCCAAACAGACA |
| CD44_G1t3_Tag_FWD | GTGGGGGAATGGGACATGAG   |
| CD44_G1t3_Tag_REV | GCACTTTCCTGACCACCTT    |
| CD44_G4_Tag_FWD   | TCCTAGCCAGAAGTGGGTGT   |
| CD44_G4_Tag_REV   | AGGAGGGCTCTCCCCAAAAT   |
| CD29_G1t2_Tag_FWD | AGCAGGATGAGGAGGAGAGG   |
| CD29_G1t2_Tag_REV | ACACTTGGGTCAGTTCTGGG   |
| CD29_G3_Tag_FWD   | TTGGCACACCAGCTCTCAAT   |
| CD29_G3_Tag_REV   | GTGGCATCCCACTACACACA   |

## Supplementary Figure S1

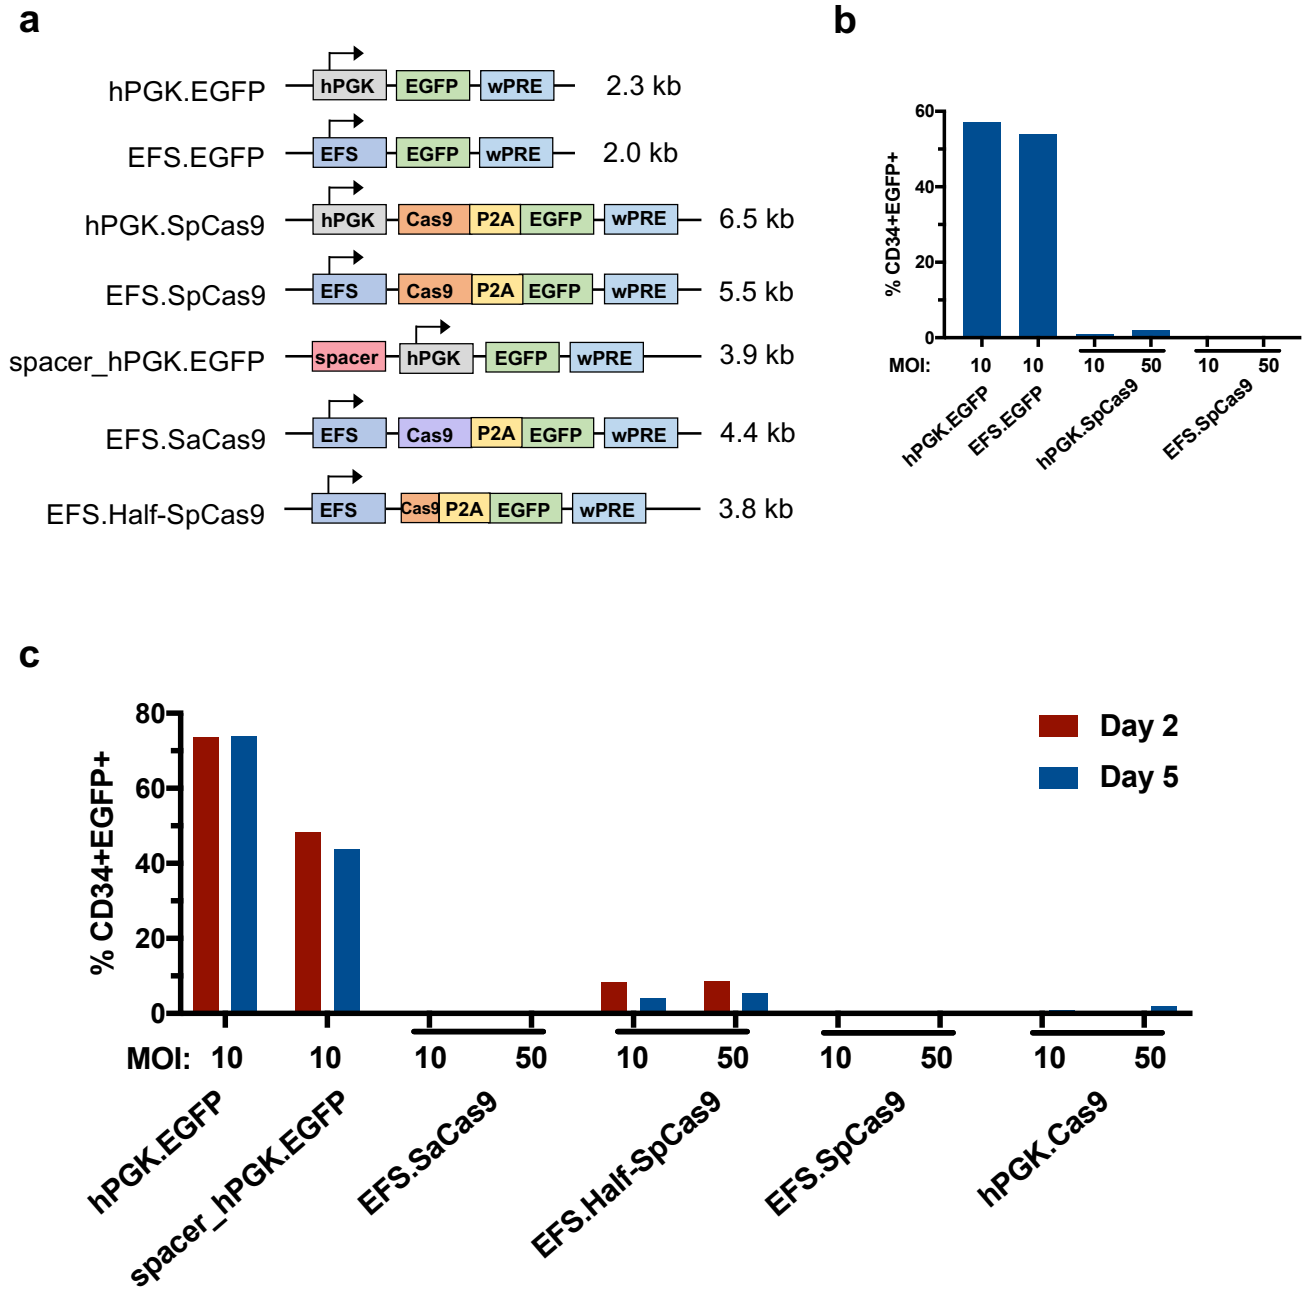

### Supplementary Figure S1. Challenge of lentiviral Cas9 delivery in human CD34<sup>+</sup> HSPCs

(a) Schematic outline of pLCv2 vectors. (b and c) CD34<sup>+</sup> HSPCs were transduced on day 2 post-thaw. EGFP and CD34 expression was analysed by flow cytometry on day 2 and/or day 5 post-transduction.

## Supplementary Figure S2

**a**

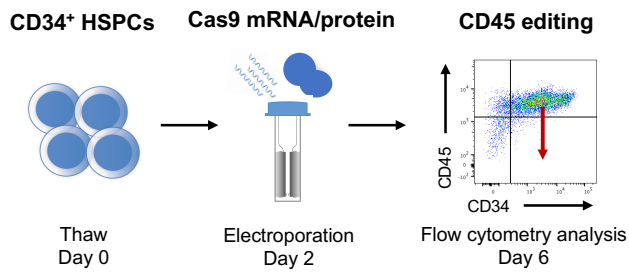

**b**

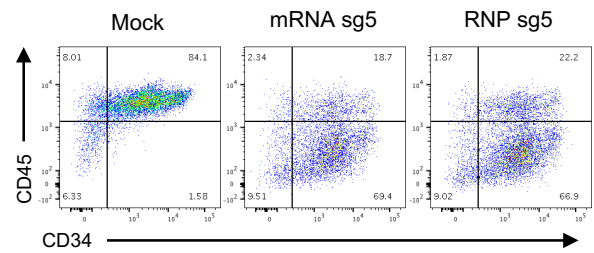

**c**

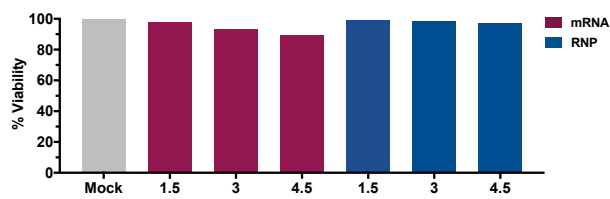

**d**

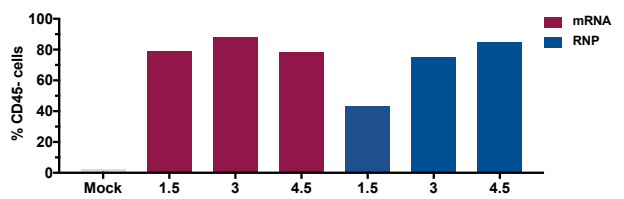

### Supplementary Figure S2. CD45 editing using Cas9 mRNA or protein with synthetic, modified sgRNA

CD34<sup>+</sup> HSPCs were treated with Cas9 mRNA or protein at various concentrations, in combination with co-electroporated modified, synthetic sgRNA targeting CD45 (sg5), and analysed by flow cytometry. **(a)** Overview of experimental outline. **(b)** Representative FACS plots of CD45 editing using 1.5  $\mu$ g Cas9 mRNA or 3  $\mu$ g Cas9 protein. **(c)** Viability analysis by flow cytometry 7AAD staining. **(d)** Frequency of CD45 edited cells.

## Supplementary Figure S3

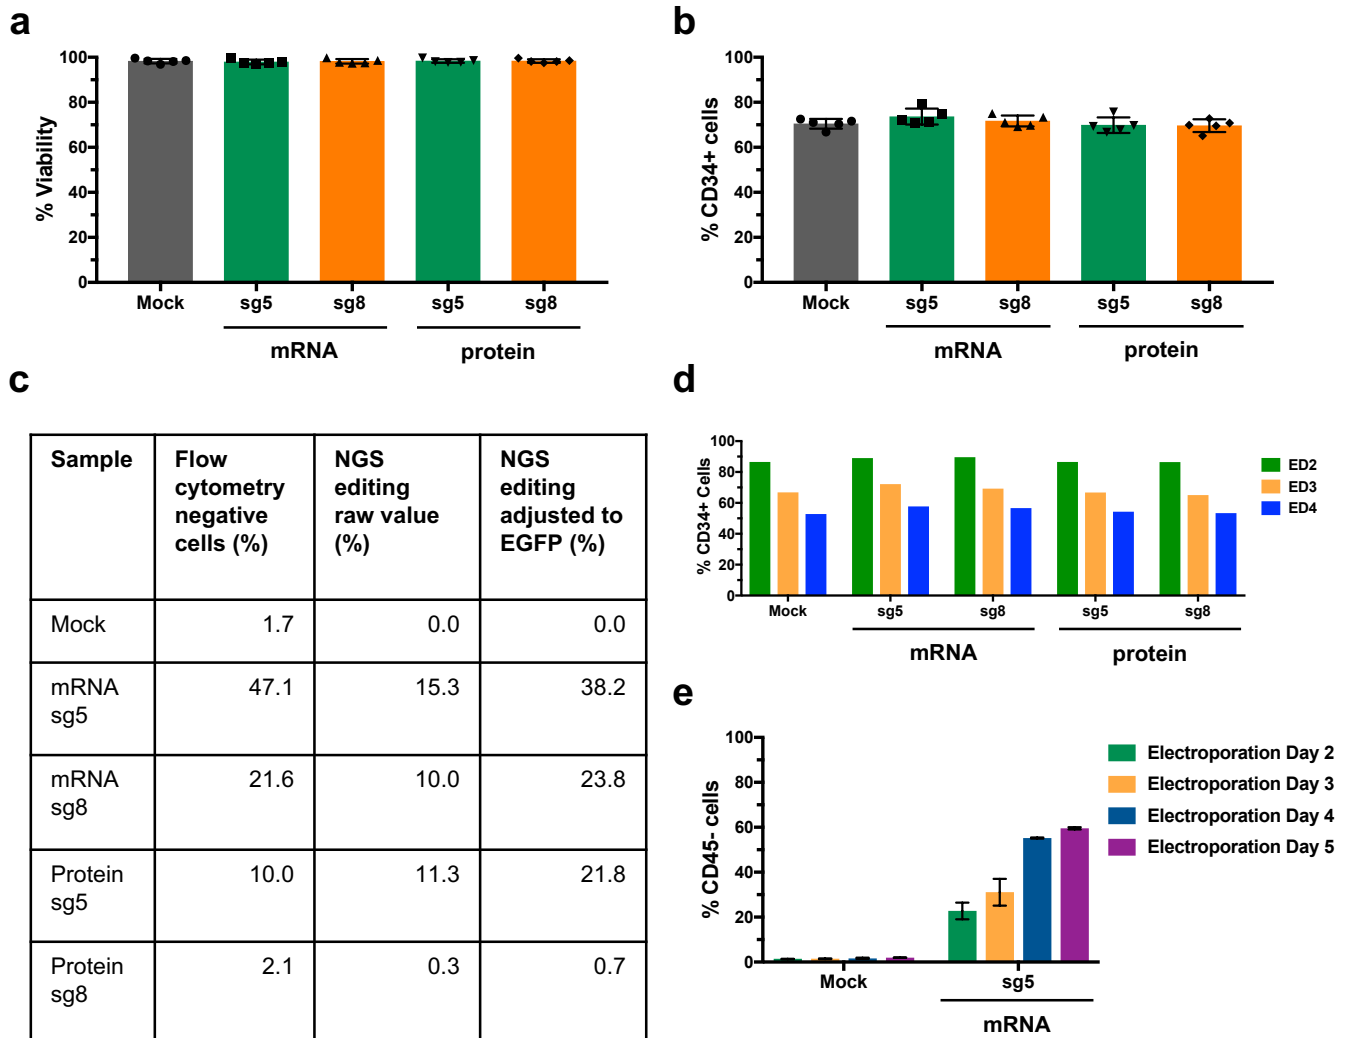

### Supplementary Figure S3. Effect on viability and CD34 expression from HSPC editing using Cas9 mRNA or protein with lentiviral sgRNA

(a and b) Primary CD34<sup>+</sup> HSPCs were transduced with sgRNA targeting CD45 (sg5 or sg8) and subsequently electroporated with Cas9 mRNA or protein (n=5). (a) Viability measured by 7AAD staining, (b) CD34<sup>+</sup> expression analysed by flow cytometry 4 days following the electroporation and (c) NGS analysis for representative samples, cells were collected 4 days following the electroporation. Note, raw gene editing efficiency scores were divided by percent EGFP<sup>+</sup> cells to provide an estimate of editing efficiency within the transduced population. (d) CD34<sup>+</sup> cells were transduced on day 1 with sgRNA targeting CD45, electroporated on either day 2, 3 or 4, and subsequently analysed by flow cytometry for CD34 expression 4 days following the electroporation. (e) CD34<sup>+</sup> cells were transduced on day 1 with sgRNA targeting CD45, electroporated with Cas9 mRNA on either day 2, 3, 4 or 5, and subsequently analysed by flow cytometry for CD45<sup>-</sup> cells 4 days following the electroporation.

## Supplementary Figure S4

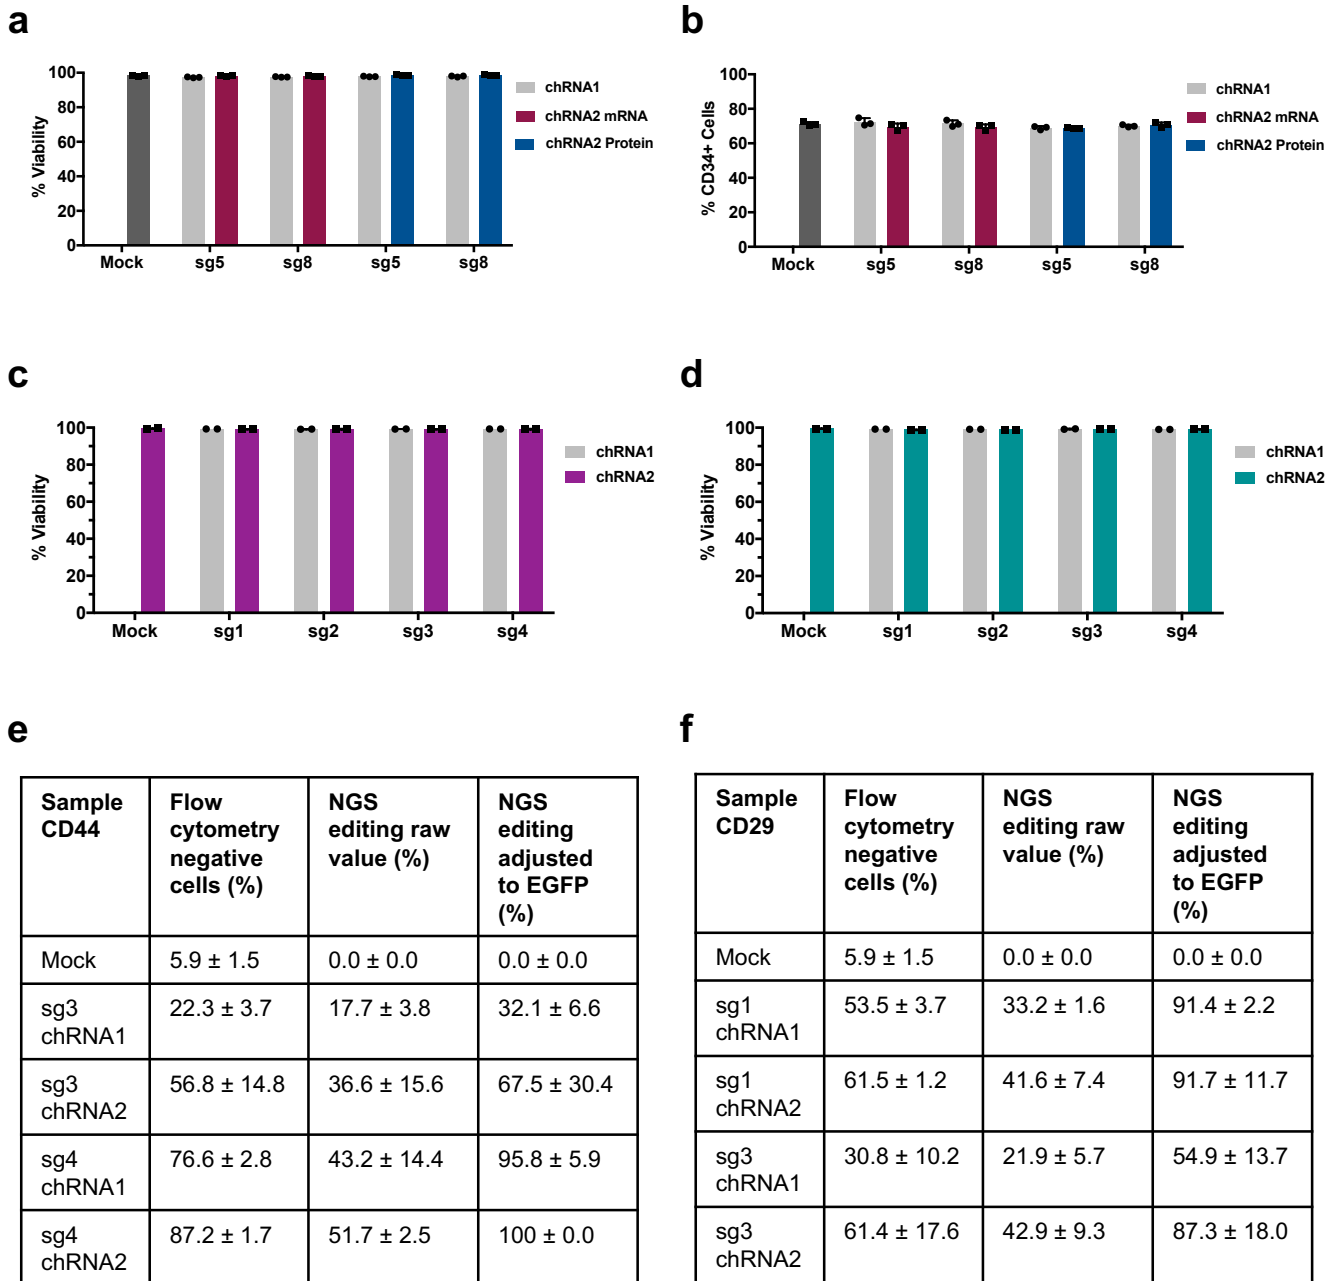

### Supplementary Figure S4. Modified chimeric guide RNA backbone enhances editing efficiency in HSPCs without compromising viability or CD34 expression

CD34<sup>+</sup> cells were transduced with sg5 or sg8 targeting CD45 encoding either chimeric guide RNA backbone 1 or 2 on day 1 post-thaw, electroporated with Cas9 mRNA or protein on day 4, and analysed by flow cytometry on day 8 (n=3). (a) Viability by 7AAD staining and (b) CD34<sup>+</sup> expression.

CD34<sup>+</sup> cells were transduced on day 1 post-thaw with 4 different lentiviral sgRNAs per target gene encoding either chimeric guide RNA backbone 1 or 2, electroporated with 2 µg Cas9 mRNA on day 4, and analysed by flow cytometry on day 8. At this time point, cells were also collected for NGS (n = 2). (c) Viability by 7AAD staining in CD44 edited cells and (d) in CD29 edited cells. (e) NGS analysis of the CD44 locus and (f) of the CD29 locus in edited cells ± standard deviation (s.d.). Note, raw gene editing efficiency scores were divided by percent EGFP<sup>+</sup> cells to provide an estimate of editing efficiency within the transduced population.

## Supplementary Figure S5

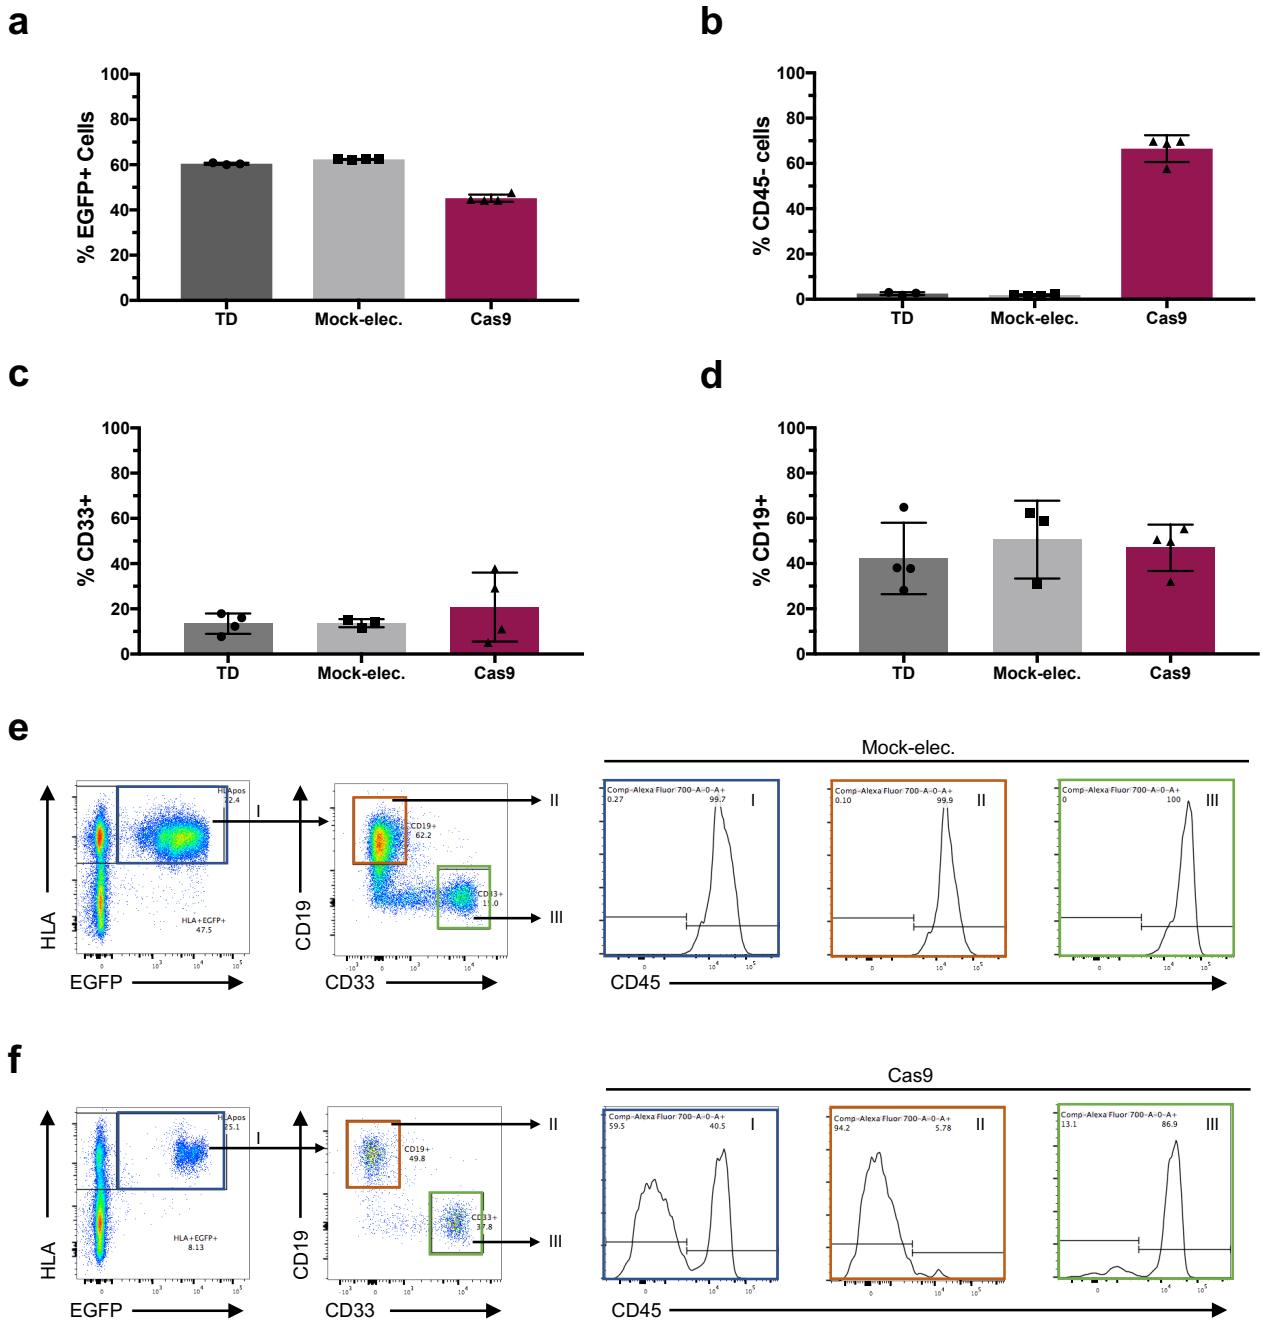

**Supplementary Figure S5. Edited CD34<sup>+</sup> HSPCs retain reconstitution capacity in vivo** (a and b) A portion of edited CD34<sup>+</sup> cells from each group was not used for transplantation and maintained in culture and analysed by flow cytometry 4 days after electroporation. (a) Frequency of EGFP<sup>+</sup> cells. (b) Frequency of CD45<sup>-</sup> cells in the EGFP<sup>+</sup> population. (c-f) BM from transplanted NSG mice harvested 9-12 weeks post-transplantation analysed by flow cytometry. n=3-4 mice per group. (c) Frequency of CD33<sup>+</sup> cells within the HLA<sup>+</sup>EGFP<sup>+</sup> population. (d) Frequency of CD19<sup>+</sup> cells within the HLA<sup>+</sup>EGFP<sup>+</sup> population. (e and f) Gating strategy to determine CD45 editing in the HLA<sup>+</sup>EGFP<sup>+</sup> population (I), CD19<sup>+</sup> population (II) and in the CD33<sup>+</sup> population (III), showing examples for (e) mock-electroporated and (f) Cas9-electroporated cells.
